# Supplementary material for: Dual-Lifetime Referencing (t-DLR) Optical Fiber Fluorescent pH Sensor for Microenvironments
Source: MDPI journal article supplement (doi:10.3390/s23218865), 2023-10-31
Supplement: s1 [file s1]

## Contents

|                                                                                             |    |
|---------------------------------------------------------------------------------------------|----|
| Sensor cost .....                                                                           | 1  |
| Spectra and structure characterization of iminocoumarin.....                                | 3  |
| Dynamic light scattering (DLS) characterization of Ru(dpp) <sub>3</sub> -PAN particles..... | 6  |
| <i>t</i> -DLR interrogation system .....                                                    | 8  |
| Sensor usable lifetime .....                                                                | 10 |
| Sensor response time.....                                                                   | 11 |
| Signal processing without background subtraction .....                                      | 12 |

## Sensor cost

**Table S1.** The cost of the main interrogation components typically used in DLR. The total cost for the *t*-DLR pH sensor in this work was approximately \$3,400 USD.

| Methods              | Typical electronic requirement        | Cost (USD)           |
|----------------------|---------------------------------------|----------------------|
| <i>f</i> -DLR [1, 2] | Dual-phase lock-in amplifier          | > \$ 6000            |
| <i>t</i> -DLR [3, 4] | Pulse generator                       | > \$ 4000            |
|                      | Photon counting device and DAC system | > \$ 4000 to \$ 8000 |
| This work:           |                                       |                      |
| <i>t</i> -DLR system | Electronic components                 | \$ 1300              |
|                      | (Optical components)                  | (\$ 2100)            |

**Table S2.** Comparison of iminocoumarin with other commonly used optical sensing fluorescent dyes with a pH-sensitive range between 6 to 8.

| Dye                | pK <sub>a</sub><br>(pH range) | Measurement<br>Wavelengths                                                                                                                | Application Notes                                        | Features                                        | Price<br>(NZD)       |
|--------------------|-------------------------------|-------------------------------------------------------------------------------------------------------------------------------------------|----------------------------------------------------------|-------------------------------------------------|----------------------|
| SNARF [1]          | ~7.5<br>6.0–8.0               | $\lambda_{\text{ex}}$ = 514 or 488 nm<br>$\lambda_{\text{em}}$ = 580/640 nm                                                               | Ideal conjugate for ratiometric emission measurements.   | Low quantum yield                               | \$885 (1 mg)         |
| BCECF [2]          | ~7.0<br>6.5–7.5               | $\lambda_{\text{ex}}$ = 490/440 nm<br>$\lambda_{\text{em}}$ = 530 nm                                                                      | Ideal conjugate for ratiometric excitation measurements. | Poor photostability                             | \$489 (1 mg)         |
| CF [3]             | 6.5<br>6.0–8.0                | $\lambda_{\text{ex}}$ = 470 nm<br>$\lambda_{\text{em}}$ = 492 nm<br>$\lambda_{\text{em}}$ = 514 nm                                        | High quantum yield in alkali                             | Hydrophilic, low Stokes shifts, sensitive to IS | \$101 (1 g)          |
| HPTS [4, 5]        | 5.4, 7.4<br>(6.0–8.0)         | $\lambda_{\text{ex}}$ = 465 nm,<br>$\lambda_{\text{ex}}$ = 450/405 nm<br>$\lambda_{\text{em}}$ = 510 nm                                   | High quantum yield                                       | Hydrophilic, sensitive to IS                    | \$244 (1 g)          |
| Imino-coumarin [6] | 8.05<br>(5.0-10.0)            | (pH 2)<br>$\lambda_{\text{ex}}$ = 480, $\lambda_{\text{em}}$ = 520<br>(pH 11)<br>$\lambda_{\text{ex}}$ = 430, $\lambda_{\text{em}}$ = 480 | High quantum yield                                       | Insensitive to IS                               | Laboratory synthesis |

CF - 5(6)-Carboxyfluorescein, HPTS - 8-Hydroxypyrene-1,3,6-trisulfonic acid trisodium salt, BCECF - 2',7'-Bis(2-carboxyethyl)-5(6)-carboxyfluorescein, SNARF – seminaphthorhodafluor, SNAFL – seminaphthorfluorescein

## Spectra and structure characterization of iminocoumarin

The melting point of the synthesized iminocoumarin was  $239 \pm 1.3$  °C (literature: 238 °C [7]).

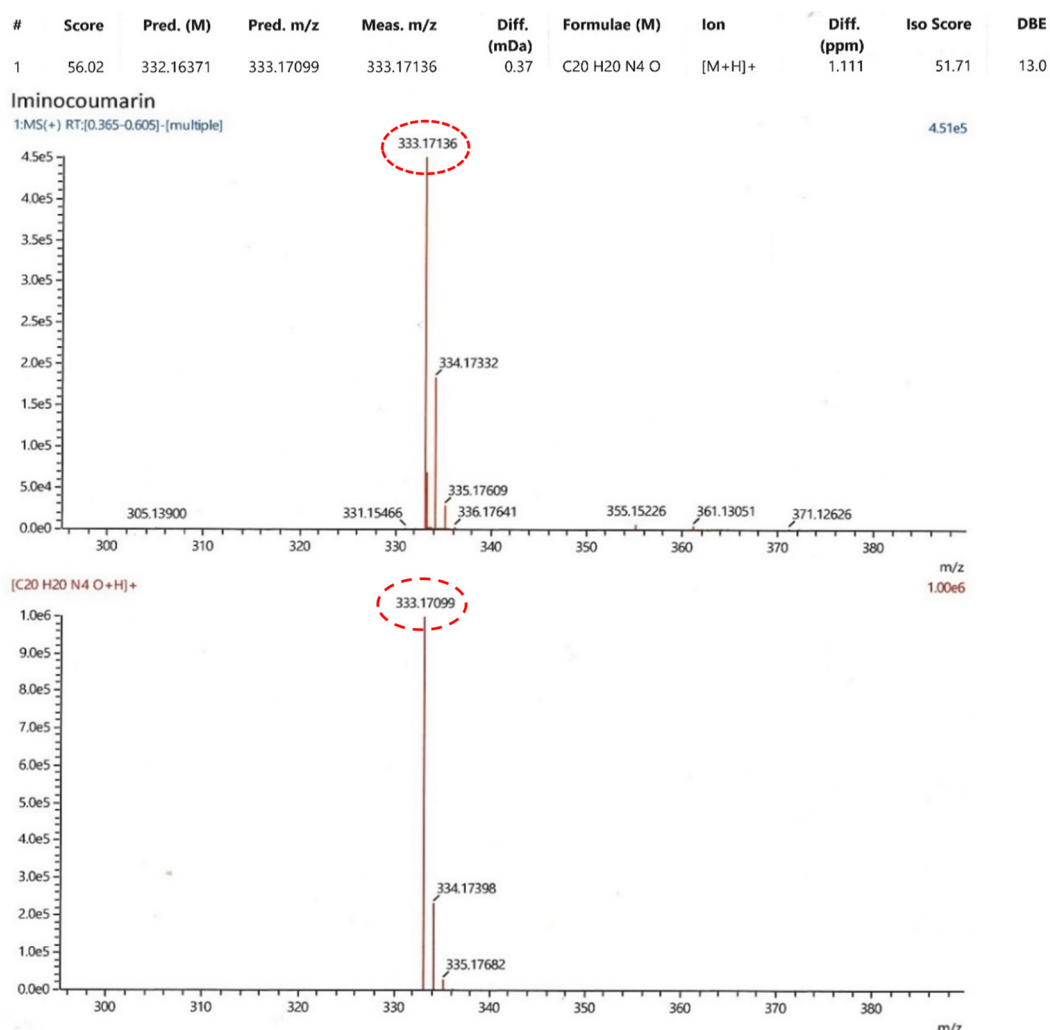

**Figure S1.** HR-MS spectrum of the synthesized iminocoumarin. Measurements were conducted by the Technical Support Team from the Chemistry Department of the University of Otago.

**<sup>1</sup>H NMR** (500 MHz, TFA-d)  $\delta$  11.50 (s, 3H), 8.82 (dd,  $J$  = 107.5, 5.3 Hz, 1H), 8.04 (d,  $J$  = 8.7 Hz, 1H), 7.80 (dt,  $J$  = 6.7, 3.3 Hz, 2H), 7.74 – 7.65 (m, 2H), 7.62 – 7.55 (m, 2H), 3.77 (q,  $J$  = 7.2 Hz, 4H), 1.28 (t,  $J$  = 7.2 Hz, 6H).

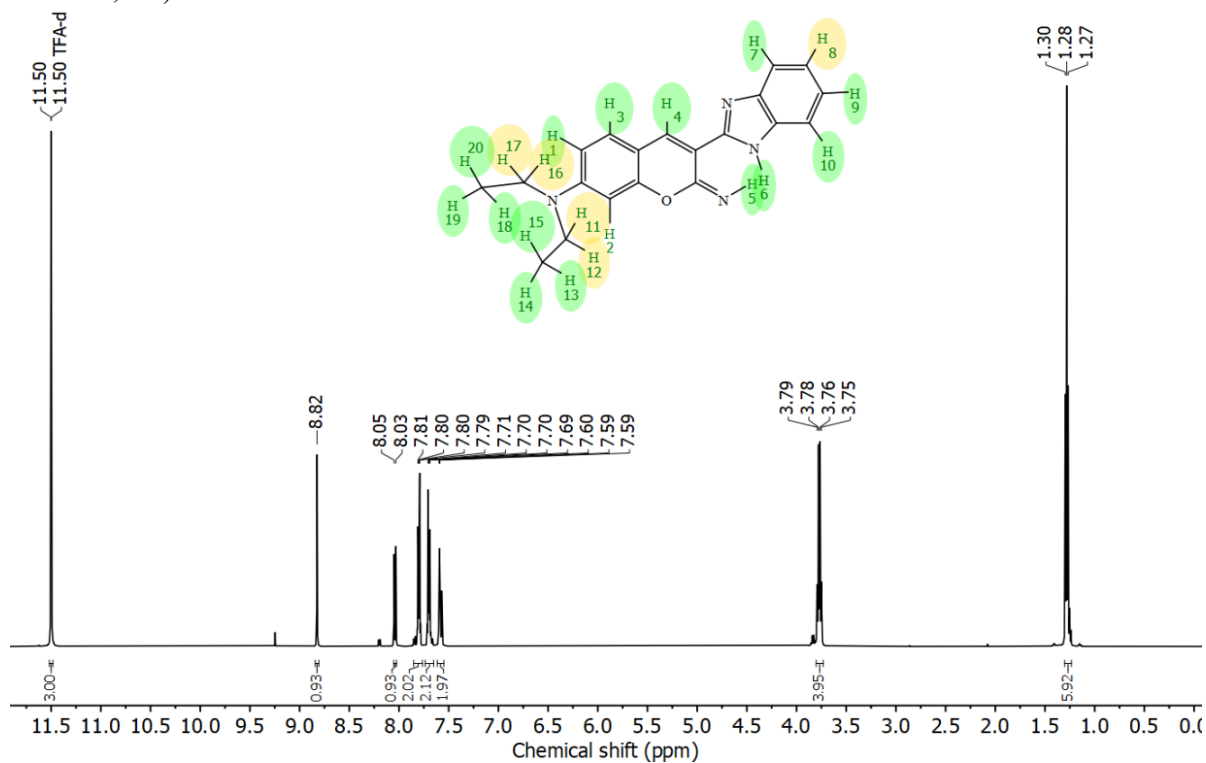

**Figure S2.** <sup>1</sup>H-NMR of the synthesized iminocoumarin in TFA-d.

**<sup>13</sup>C-NMR** (101 MHz, TFA-d)  $\delta$  167.78, 154.57, 152.82, 143.26, 137.60, 134.53, 132.59, 122.99, 119.92, 118.89, 117.64, 110.23, 55.68, 13.23.

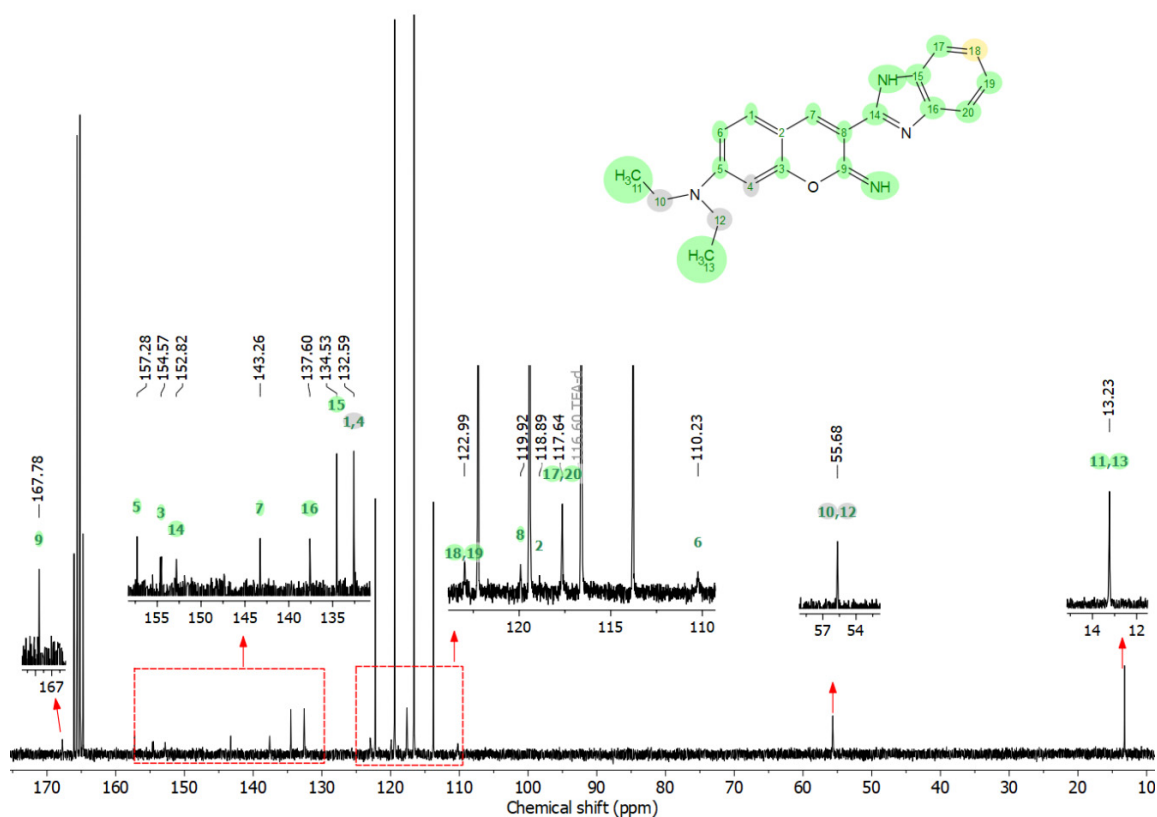

**Figure S3.** <sup>13</sup>C-NMR of the synthesized iminocoumarin in TFA-d.

### <sup>1</sup>H-NMR of the fabricated Ru(dpp)<sub>3</sub>-PAN particles

The peaks marked 1 and 2 are αH and βH proton peaks of PAN, respectively. The peaks marked 3 between chemical shifts, 8.5 to 7.6 ppm are proton peaks of a Ru(dpp)<sub>3</sub> molecule (proton integration H=48). Proton integration ratio of Ru(dpp)<sub>3</sub> to PAN (α : β) are 0.02 : (1.00 : 0.50). The <sup>1</sup>H NMR of Ru(dpp)<sub>3</sub>-PAN showed no DMF peaks [8] at 7.95, 2.89, and 2.75 ppm (Figure S4).

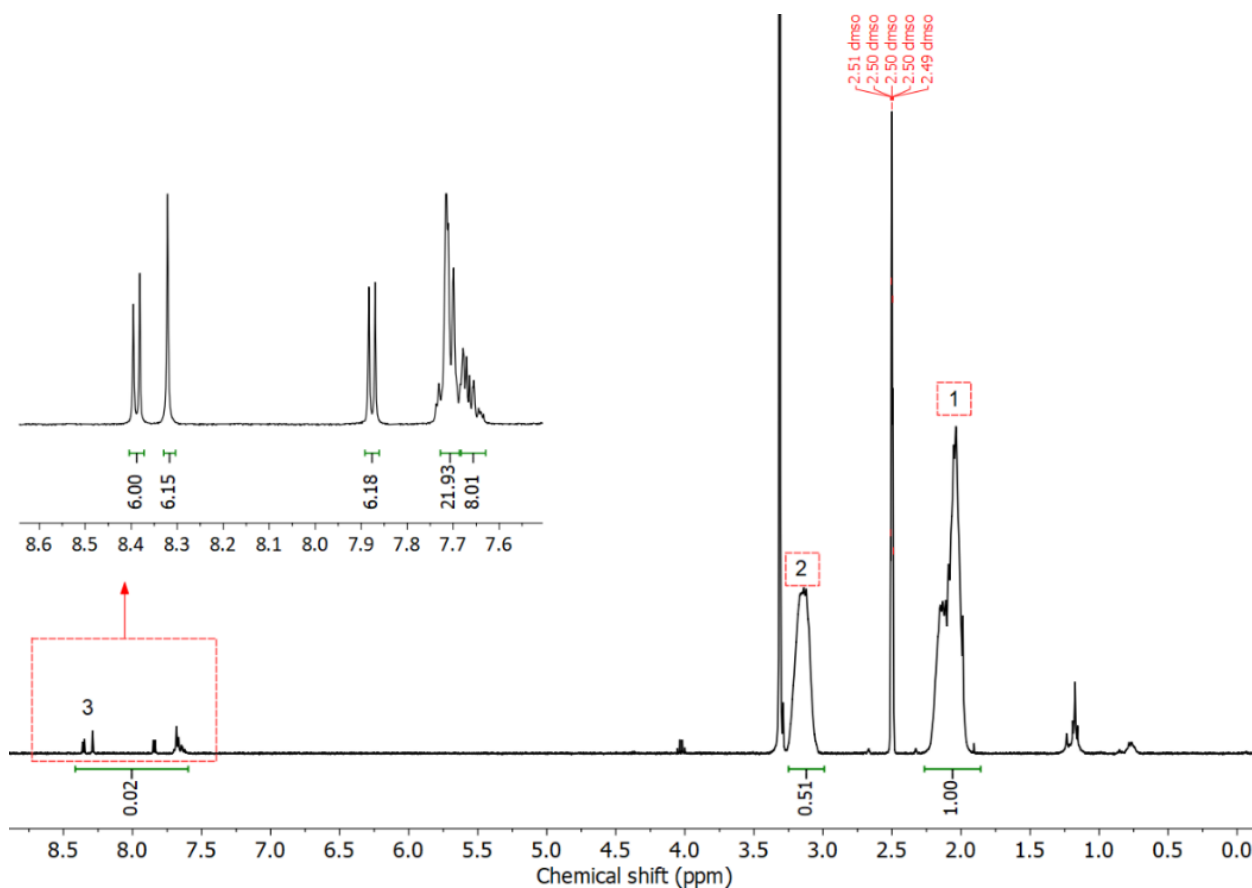

**Figure S4.** <sup>1</sup>H-NMR (400 MHz) spectrum of Ru(dpp)<sub>3</sub>-PAN particles dissolved in DMSO-d<sub>6</sub>.

### Dynamic light scattering (DLS) characterization of Ru(dpp)<sub>3</sub>-PAN particles

The polydispersity index (PDI) of the Ru(dpp)<sub>3</sub>-PAN particles was found to be 0.513, which is within the range of 0.05 and 0.7 where DLS analysis is considered suitable for measuring the particle size of suspensions. However, the DLS measurement revealed a broad size distribution of Ru(dpp)<sub>3</sub>-PAN, suggesting the presence of aggregation in the samples as shown by two peaks in the size distribution results (Figure S5a, Figure S5b).

The zeta potential of the synthesized Ru(dpp)<sub>3</sub>-PAN particles was found to be negative  $5.52 \pm 0.1$  mV. Zeta potential in the range of 0 to 5 mV was described as rapid coagulation or flocculation, and 40 to 60 mV is regarded as having good stability [9]. Thus, the synthesized Ru(dpp)<sub>3</sub>-PAN with a zeta potential value of  $5.52 \pm 0.1$  mV will likely lead to agglomeration. The synthesized Ru(dpp)<sub>3</sub>-PAN particles are probably composed of individual nanospheres (< 60 nm) held together by electrostatic attraction in the form of agglomerates.

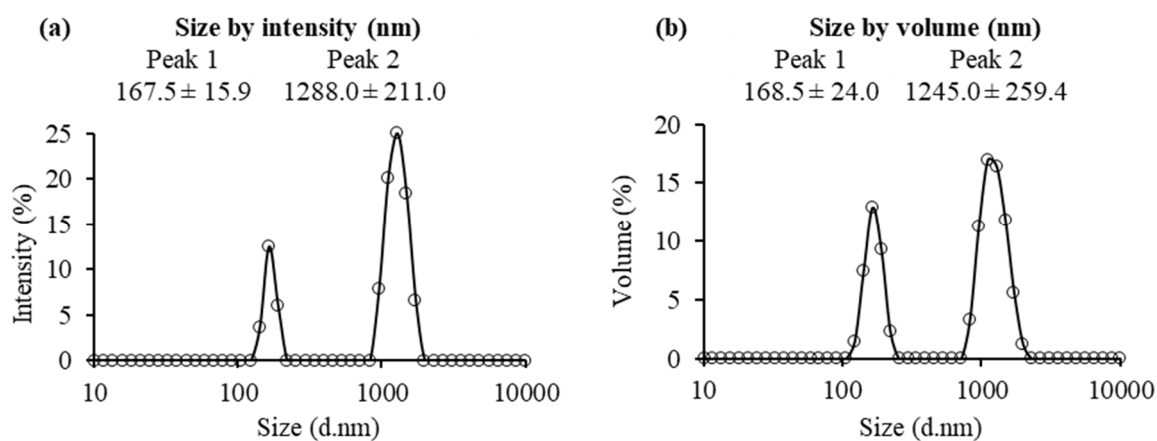

**Figure S5.** Ru(dpp)<sub>3</sub>-PAN size distribution results using DLS measurement are presented as the average and standard deviation by the (a) intensity and (b) volume.

### Fluorescence spectra

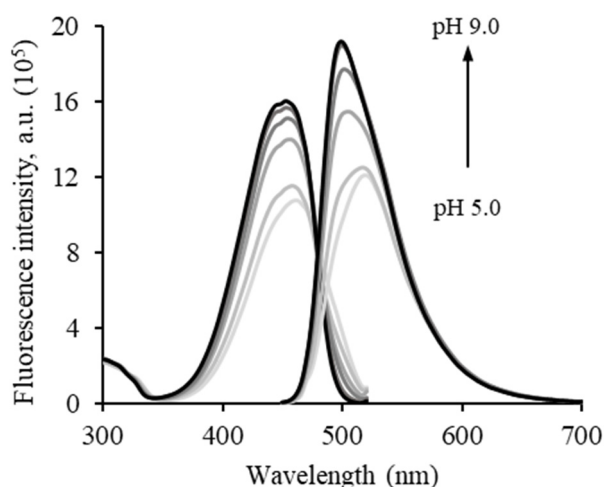

**Figure S6.** Fluorescence spectra of iminocoumarin showed the indicator was pH-dependent. In a range of pH buffer solutions, the excitation and emission fluorescence intensity of iminocoumarin increased as pH increased from 5 to 9 (light to dark).

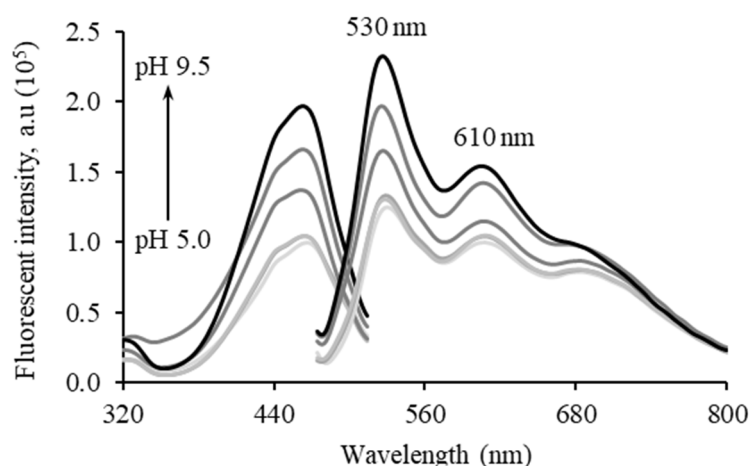

**Figure S7.** Dual-luminophores sol-gel coated glass slide in buffer solutions from pH 5 to 9.5 (IS = 0.7 M) showed emission peaks at 530 and 610 nm and broad absorbance of 380 to 480 nm. The fluorescence intensity of the dual luminophores increased as pH increased from pH 5 to 9.5 (light to dark).

**Table S3.** Ru(dpp)<sub>3</sub>-PAN and iminocoumarin sol-gel blend. The dual-layer pH sensor comprised two sol-gel coatings, an inner layer of Ru(dpp)<sub>3</sub>-PAN (active Ru(dpp)<sub>3</sub> 0.35 mM), and an outer layer of iminocoumarin (5.3 mM).

|                           | MW<br>(g mol <sup>-1</sup> ) | Density<br>(g mL <sup>-1</sup> ) | Ru(dpp) <sub>3</sub> -PAN sol-gel |                          |                          |                          | Iminocoumarin sol-gel |                       |                       |                       |
|---------------------------|------------------------------|----------------------------------|-----------------------------------|--------------------------|--------------------------|--------------------------|-----------------------|-----------------------|-----------------------|-----------------------|
|                           |                              |                                  | (mL)                              | (gram)                   | (mol)                    | molar ratio              | (mL)                  | (gram)                | (mol)                 | molar ratio           |
| Precursor                 |                              |                                  |                                   |                          |                          | (1.00)                   |                       |                       |                       | (1.00)                |
| TEOS                      | 208.33                       | 0.933                            | 1.850                             |                          | 8.29×10 <sup>-3</sup>    | 0.80                     | 1.000                 |                       | 4.48×10 <sup>-3</sup> | 0.79                  |
| DDS                       | 148.28                       | 0.865                            | 0.360                             |                          | 2.10×10 <sup>-3</sup>    | 0.20                     | 0.200                 |                       | 1.17×10 <sup>-3</sup> | 0.21                  |
| Ethanol                   | 46.07                        | 0.789                            | 1.280                             |                          | 2.19×10 <sup>-2</sup>    | 2.11                     | 1.090                 |                       | 1.87×10 <sup>-2</sup> | 3.31                  |
| Iminocoumarin             | 332.17                       |                                  |                                   |                          |                          |                          |                       | 4.80×10 <sup>-3</sup> | 1.44×10 <sup>-5</sup> | 2.60×10 <sup>-3</sup> |
| Ru(dpp) <sub>3</sub> -PAN |                              |                                  |                                   | 9.00×10 <sup>-2</sup>    |                          |                          |                       |                       |                       |                       |
| (Ru(dpp) <sub>3</sub> )   | 1169.17                      |                                  |                                   | (1.76×10 <sup>-3</sup> ) | (1.51×10 <sup>-6</sup> ) | (1.45×10 <sup>-4</sup> ) |                       |                       |                       |                       |
| Triton X-100              | 647                          | 1.07                             |                                   | 6.10×10 <sup>-2</sup>    | 9.43×10 <sup>-5</sup>    | 9.08×10 <sup>-3</sup>    |                       | 3.35×10 <sup>-2</sup> | 5.18×10 <sup>-5</sup> | 9.20×10 <sup>-3</sup> |
| 0.1 M HCl                 | 36.46                        |                                  | 0.300                             |                          | 3.00×10 <sup>-5</sup>    | 2.89×10 <sup>-3</sup>    | 0.165                 |                       | 1.65×10 <sup>-5</sup> | 2.90×10 <sup>-3</sup> |
| Milli-Q                   | 18                           | 1                                | 0.455                             | 0.752                    | 4.18×10 <sup>-2</sup>    | 4.03                     | 0.245                 | 0.409                 | 2.27×10 <sup>-2</sup> | 4.02                  |
| TOTAL (mL)                |                              |                                  | ~ 4.3                             |                          |                          |                          | ~ 2.7                 |                       |                       |                       |

| Optical fibres with sol-gel coatings                                                  | Entrapped luminophores                                                                                                    | Film thickness    |
|---------------------------------------------------------------------------------------|---------------------------------------------------------------------------------------------------------------------------|-------------------|
| (a) 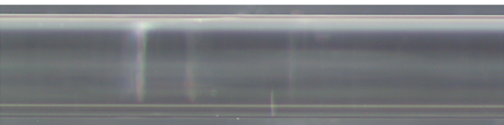 | 400 $\mu\text{m}$ optical fibre (bare)                                                                                    | NA                |
| (b)  | Ru(dpp) <sub>3</sub> -PAN sol-gel coating                                                                                 | 5.3 $\mu\text{m}$ |
| (c)  | Iminocoumarin sol-gel coating                                                                                             | 1.3 $\mu\text{m}$ |
| (d)  | Two layers of sol-gel coatings:<br>1 <sup>st</sup> layer Ru(dpp) <sub>3</sub> -PAN<br>2 <sup>nd</sup> layer iminocoumarin | 6.6 $\mu\text{m}$ |

**Figure S8.** The microscope views (obtained with Leica DFC295) of (a) a bare fiber without coating, (b) Ru(dpp)<sub>3</sub>-PAN sol-gel coating (dip-coating speed: 58 cm min<sup>-1</sup>), (c) iminocoumarin sol-gel coating (dip-coating speed: 25 cm min<sup>-1</sup>), and (d) the dual-layer pH sensor with two layers of sol-gel coatings.

### *t*-DLR interrogation system

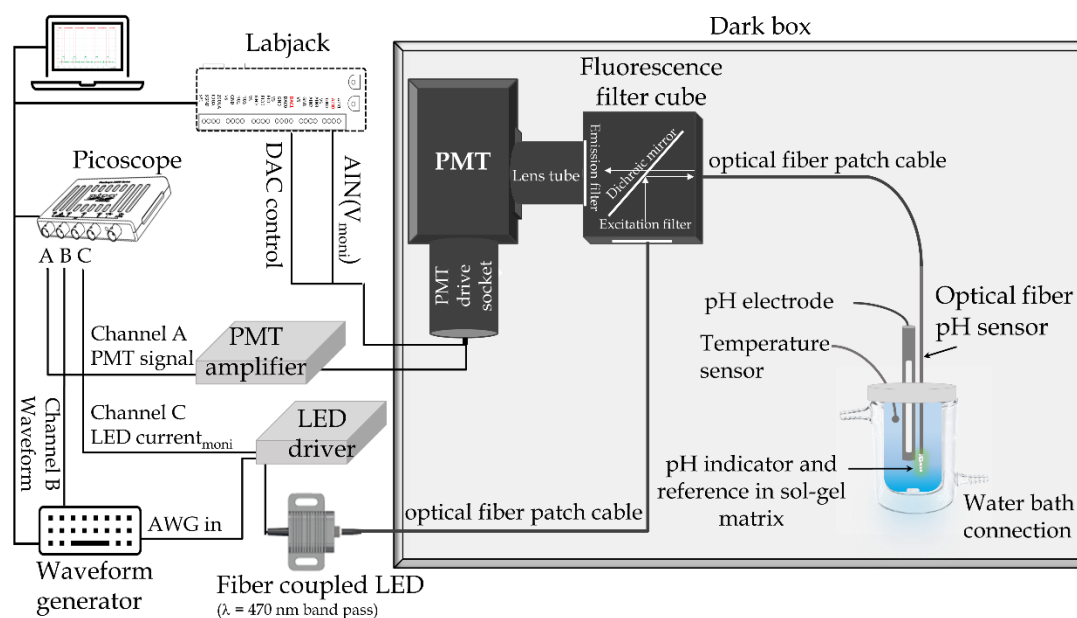

**Figure S9.** The *t*-DLR instrumentation.



## LED driver

The frequency and time for opening and closing the current diversion were dictated by the frequency and duty cycle of the AWG. In this case, the set duty cycle was referred to as the completion of an off-on cycle of the current diversion, which was an inverted on-off cycle with respect to the LED, e.g., with a frequency of 20 kHz and a duty cycle of 80%, the LED was on for 10  $\mu$ s and off for 40  $\mu$ s.

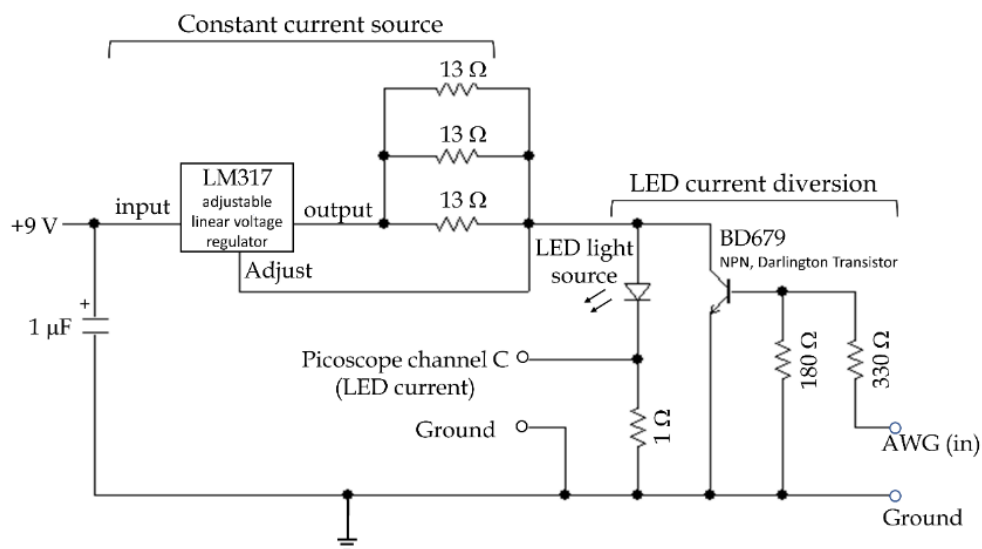

**Figure S10.** The LED driver circuit diagram (designed by Mr. Paul Reynolds).

## The 2-stage PMT amplifier

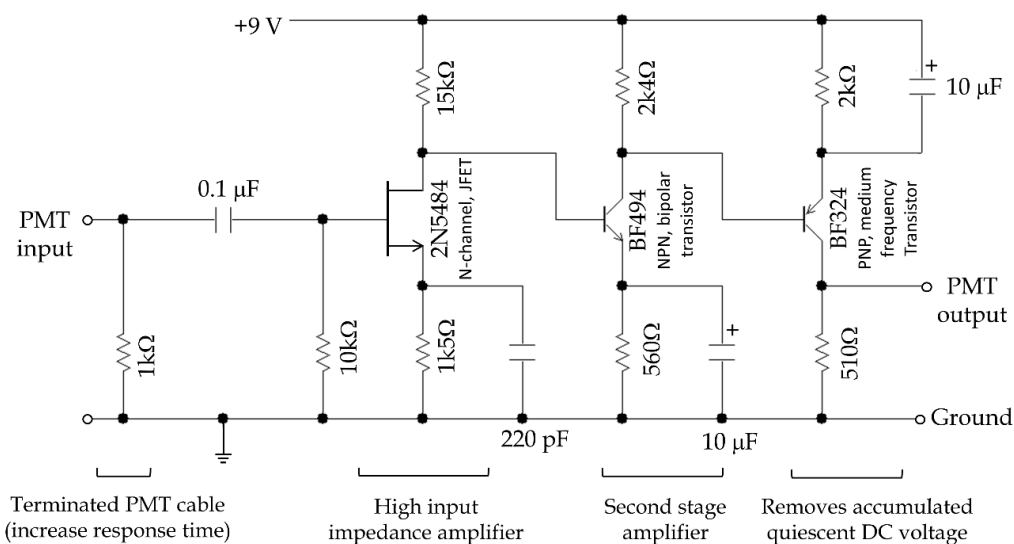

**Figure S11.** The 2-stage PMT amplification circuit diagram (designed by Mr. Paul Reynolds).

(a)

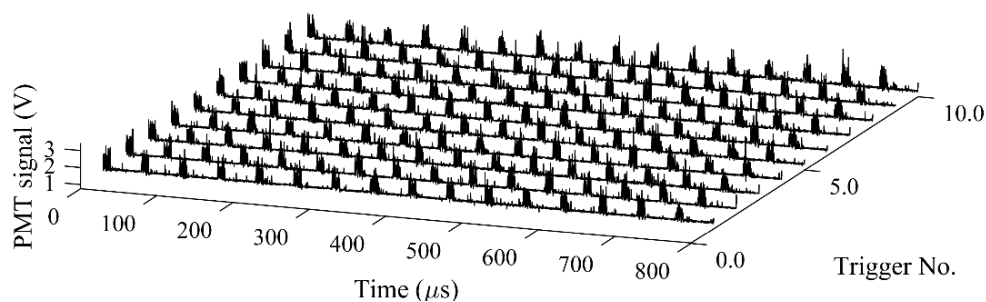

(b)

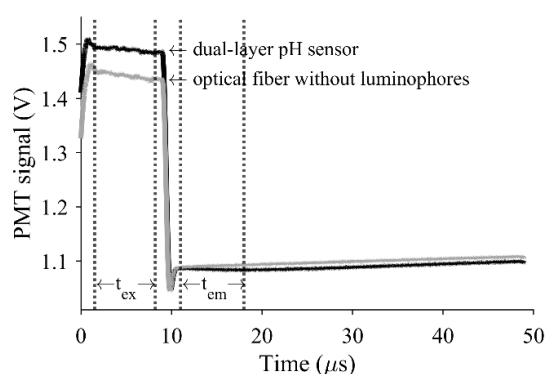

(c)

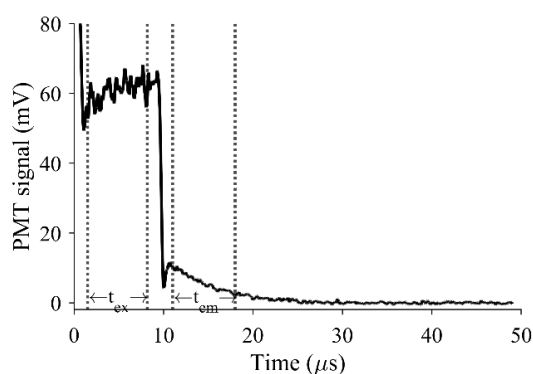

**Figure S12.** (a) A snapshot of the acquired signal (30,000 pulses). (b) A single on-off profile of the dual-layer pH sensor (—) was obtained by averaging the 30,000 on-off cycles. The signal of an optical fiber without luminophores (—) was plotted for comparison. The periods:  $t_{\text{ex}}$  and  $t_{\text{em}}$ , used to obtain excitation and emission intensity integration were denoted (...). (c) Signal appearance after background subtraction.

#### Sensor usable lifetime

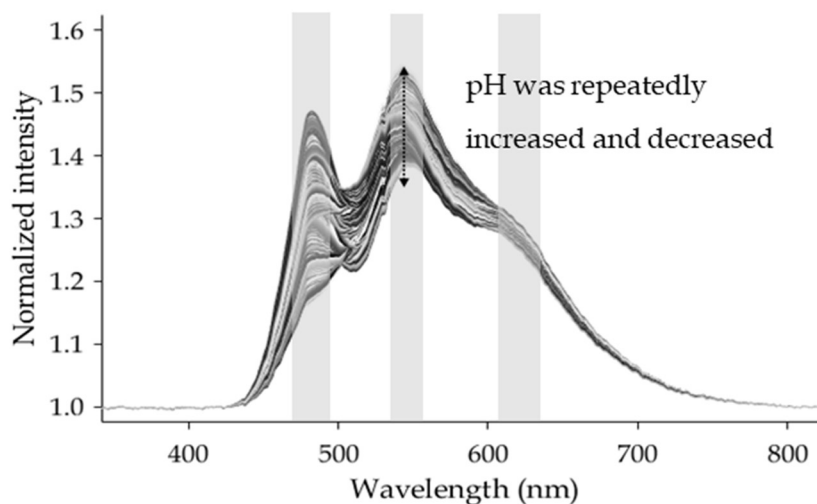

**Figure S13.** The normalized optical spectra of the pH sensor response to pH changes under continual exposure to the LED for 150 minutes. Highlighted areas indicate the LED (460 to 480 nm), iminocoumarin (535 to 545 nm), and Ru(dpp)<sub>3</sub> (600 to 620 nm).

## Sensor response time

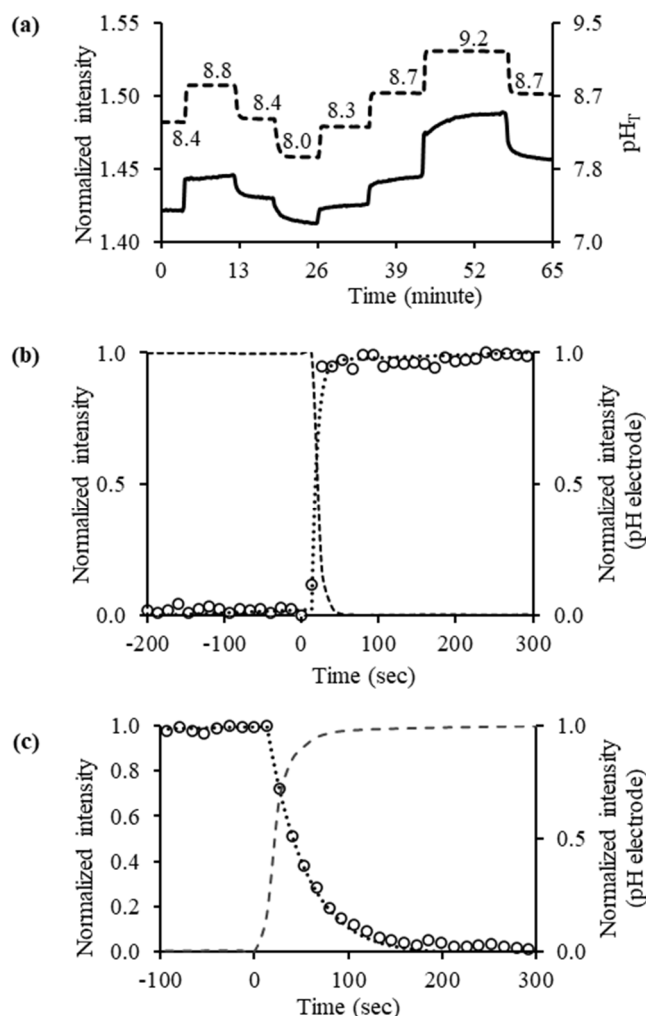

**Figure S14.** (a) The fluorescence optical fiber pH sensor response to pH change in ASW ( $S = 35$ ,  $T = 20$  °C) (—). For reference, pH<sub>T</sub> measured with a pH electrode (---) is shown. First-order LTI model curve fitting of the pH sensor (○) (b) from pH 8.4 to 8.8, and (c) from pH 8.8 to 8.4. The pH electrode (---) was used as a reference. Dotted lines (...) are the fitted curves using the MATLAB algorithm (time-response model “first-order LTI model” [10, 11]).

**Table S4.** Reported response time of fluorescence-based pH sensors.

| Reference             | Indicator                                  | Matrix                              | Application                                     | Response time (s)                                                                                                                                                                                             |
|-----------------------|--------------------------------------------|-------------------------------------|-------------------------------------------------|---------------------------------------------------------------------------------------------------------------------------------------------------------------------------------------------------------------|
| Clark, et al. [12]    | pH sensor spot from PreSens                | Unknown                             | pH optode for seawater pH measurement           | ( $t_{95}$ ) pH 7.2 to 8.5 50                                                                                                                                                                                 |
| Larsen, et al. [13]   | HPTS, Macrolex Yellow                      | Polyurethane hydrogel (Hydromed D4) | pH distribution in marine sediments             | ( $t_?$ ) pH 6.5 to 8.9 60                                                                                                                                                                                    |
| Schröder, et al. [14] | DHFA<br>DHFAE                              | Polyurethane hydrogel               | pH measurement in marine environments           | ( $t_{90}$ ) pH 8.5 to 7.5 120<br>( $t_{90}$ ) pH 7.5 to 8.5 230                                                                                                                                              |
| Current work          | Iminocoumarin<br>Ru(dpp) <sub>3</sub> -PAN | Sol-gel matrix with TEOS and DDS    | Optical fiber pH Sensor for marine environments | ( $t_{99}$ ) pH 8.4 to 8.8 44<br>( $t_{99}$ ) pH 8.8 to 8.4 196<br><br>( $t_{95}$ ) pH 8.4 to 8.8 34<br>( $t_{95}$ ) pH 8.8 to 8.4 129<br><br>( $t_{90}$ ) pH 8.4 to 8.8 29<br>( $t_{90}$ ) pH 8.8 to 8.4 100 |

## Signal processing without background subtraction

pH titration (pH 6.5 to 10) of ASW ( $S = 35$ ) at 15 °C using the dual-layer pH sensor. Signals were acquired using a 20 kHz pulse frequency (LED-on for 10  $\mu$ s, LED-off for 40  $\mu$ s).

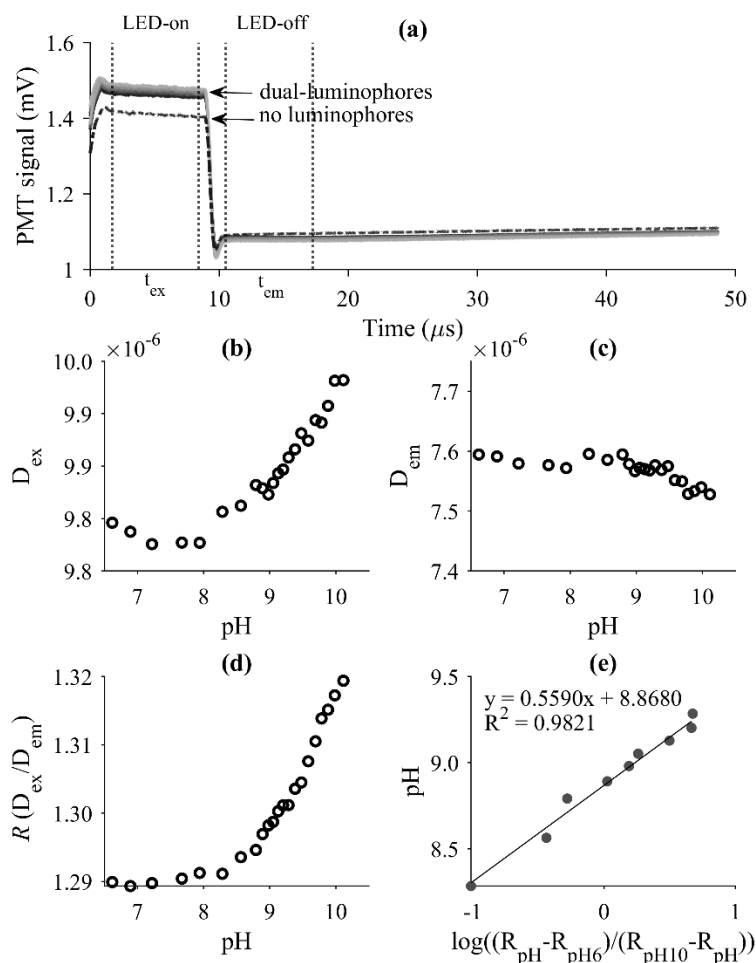

**Figure S15.** (a) The averaged signal of the dual-layer pH sensor and the background signal of an optical fiber without indicators (plotted as a comparison). The selected LED on and off regions are denoted as (...). Integration of signal intensity during (b) LED-on ( $D_{ex}$ ), and (c) LED-off ( $D_{em}$ ). (d) The calculated  $R$  values have a sigmoidal pH response curve. (e) The  $pK_a'$  of the pH sensor was determined as 8.87 ( $S = 35$ ,  $T = 15$  °C).

## Sensor precision

**Table S5.** Reported optical pH sensors with similar precision to the sensor in this study.

| Reference             | Precision | Response time                                                                          | Sensor materials                                     | Technique         |
|-----------------------|-----------|----------------------------------------------------------------------------------------|------------------------------------------------------|-------------------|
| Schröder, et al. [14] | 0.02      | <200s                                                                                  | DHFA and DHFAE in hydrogel                           | <i>t</i> -DLR/CCD |
| Wencel, et al. [5]    | 0.02      | 12 sec                                                                                 | HPTS in sol-gel                                      | Ratiometric       |
| Larsen, et al. [13]   | 0.02      | 60 sec                                                                                 | HPTS and macrolex yellow coumarin in hydrogel        | Ratiometric CCD   |
| Current work          | 0.02      | ( $t_{90}$ ) 29 to 100 sec<br>( $t_{95}$ ) 34 to 129 sec<br>( $t_{99}$ ) 44 to 196 sec | Iminocoumarin / Ru(dpp) <sub>3</sub> -PAN in sol-gel | <i>t</i> -DLR     |

## References

1. Han, J.; Burgess, K. Fluorescent indicators for intracellular pH. *Chem Rev* **2010**, *110*, 5, 2709-28, <https://doi.org/10.1021/cr900249z>
2. Boens, N.; Qin, W.; Basaric, N.; Orte, A.; Talavera, E. M.; Alvarez-Pez, J. M. Photophysics of the fluorescent pH indicator BCECF. *J Phys Chem A* **2006**, *110*, 30, 9334-43, <https://doi.org/10.1021/jp0615712>
3. Liebsch, G.; Klimant, I.; Krause, C.; Wolfbeis, O. S. Fluorescent imaging of pH with optical sensors using time domain dual lifetime referencing. *Anal Chem* **2001**, *73*, 17, 4354-63, <https://doi.org/10.1021/ac0100852>
4. Chandra, A.; Prasad, S.; Iuele, H.; Colella, F.; Rizzo, R.; D'Amone, E.; Gigli, G.; Del Mercato, L. L. Highly Sensitive Fluorescent pH Microsensors Based on the Ratiometric Dye Pyranine Immobilized on Silica Microparticles. *Chemistry* **2021**, *27*, 53, 13318-13324, <https://doi.org/doi.org/10.1002/chem.202101568>
5. Wencel, D.; MacCraith, B. D.; McDonagh, C. High performance optical ratiometric sol-gel-based pH sensor. *Sensors and Actuators B: Chemical* **2009**, *139*, 1, 208-213, <https://doi.org/10.1016/j.snb.2008.12.066>
6. Vasylevska, A. S.; Karasyov, A. A.; Borisov, S. M.; Krause, C. Novel coumarin-based fluorescent pH indicators, probes and membranes covering a broad pH range. *Anal Bioanal Chem* **2007**, *387*, 6, 2131-41, <https://doi.org/10.1007/s00216-006-1061-6>
7. Chemate, S. B.; Sekar, N. Novel Iminocoumarin Derivatives: Synthesis, Spectroscopic and Computational Studies. *J Fluoresc* **2015**, *25*, 6, 1615-28, <https://doi.org/10.1007/s10895-015-1648-4>
8. Gottlieb, H. E.; Kotlyar, V.; Nudelman, A. NMR Chemical Shifts of Common Laboratory Solvents as Trace Impurities. *J Org Chem* **1997**, *62*, 21, 7512-7515, <https://doi.org/10.1021/jo971176v>
9. Kumar, A.; Dixit, C. K., 3 - Methods for characterization of nanoparticles. In *Advances in Nanomedicine for the Delivery of Therapeutic Nucleic Acids*, Nimesh, S.; Chandra, R.; Gupta, N., Eds. Woodhead Publishing: 2017; pp 43-58.
10. Frankaer, C. G.; Sorensen, T. J. A unified approach for investigating chemosensor properties - dynamic characteristics. *Analyst* **2019**, *144*, 7, 2208-2225, <https://doi.org/10.1039/c9an00268e>
11. Frankaer, C. G.; Sorensen, T. J. Investigating the Time Response of an Optical pH Sensor Based on a Polysiloxane-Polyethylene Glycol Composite Material Impregnated with a pH-Responsive Triangulenium Dye. *ACS Omega* **2019**, *4*, 5, 8381-8389, <https://doi.org/10.1021/acsomega.9b00795>
12. Clarke, J. S.; Achterberg, E. P.; Rerolle, V. M.; Abi Kaed Bey, S.; Floquet, C. F.; Mowlem, M. C. Characterisation and deployment of an immobilised pH sensor spot towards surface ocean pH measurements. *Anal Chim Acta* **2015**, *897*, 69-80, <https://doi.org/10.1016/j.aca.2015.09.026>
13. Larsen, M.; Borisov, S.M.; Grunwald, B.; Klimant, I.; Glud, R.N. A simple and inexpensive high resolution color ratiometric planar optode imaging approach: Application to oxygen and pH sensing. *Limnol. Oceanogr. Methods* **2011**, *9*, 348-360. <https://doi.org/10.4319/lom.2011.9.348>.
14. Schroder, C. R.; Weidgans, B. M.; Klimant, I. pH fluorosensors for use in marine systems. *Analyst* **2005**, *130*, 6, 907-16, <https://doi.org/10.1039/b501306b>
